# Supplementary material
Source: PubMed Central journal article supplement (PMC419684)

# A mtCA (LIP-21)

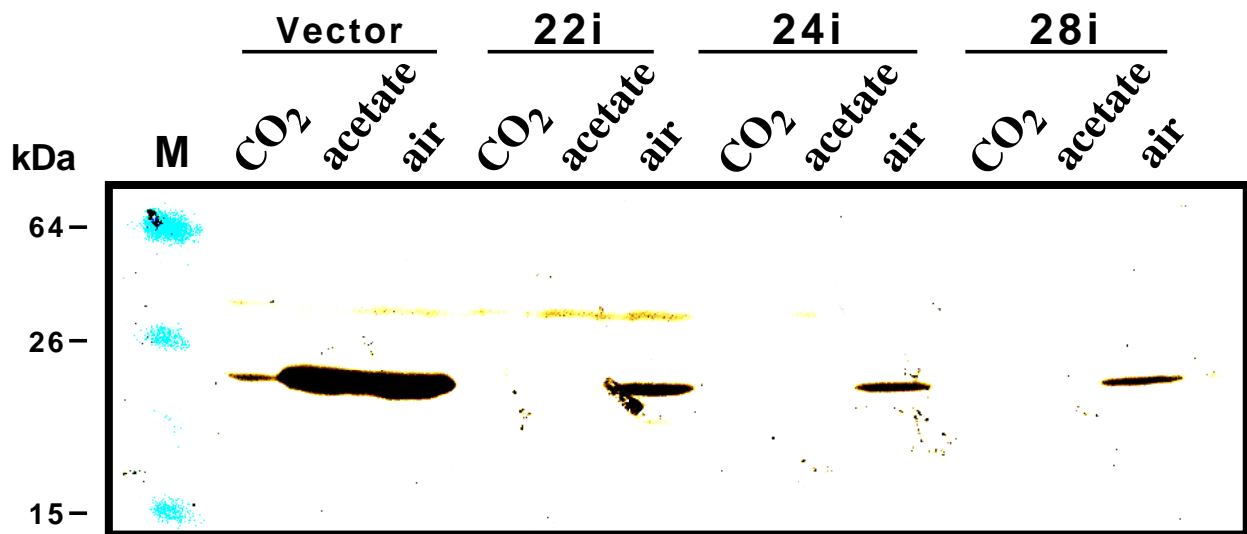

# B LIP-36

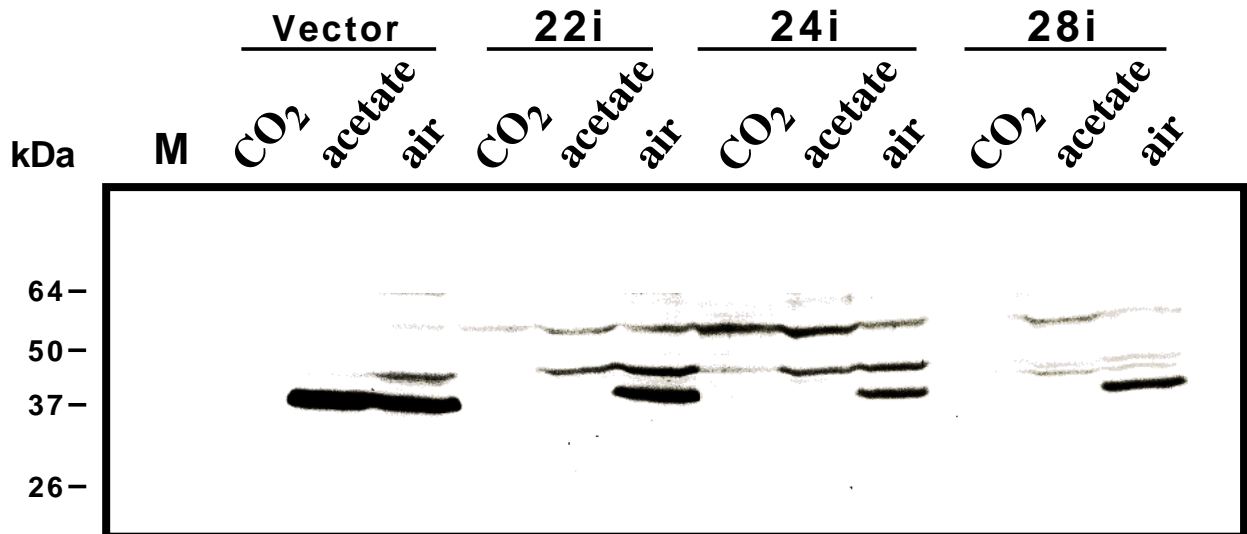

Supplement: pnas_101_20_7787__1.pdf [file pnas_101_20_7787__1.pdf]
